# Supplementary material for: Measuring urbanicity as a risk factor for childhood wheeze in a transitional area of coastal ecuador: a cross-sectional analysis
Source: HighWire-hosted journal article supplement (doi:10.1136/bmjresp-2020-000679), 2020-11-01
Supplement: bmjresp-2020-000679supp001_data_supplement.pdf [file bmjresp-2020-000679supp001_data_supplement.pdf]

**SUPPLEMENTARY FIGURES AND TABLES****Supplementary Figure SF1. Percentage of variance accounted by variables of each dimension.**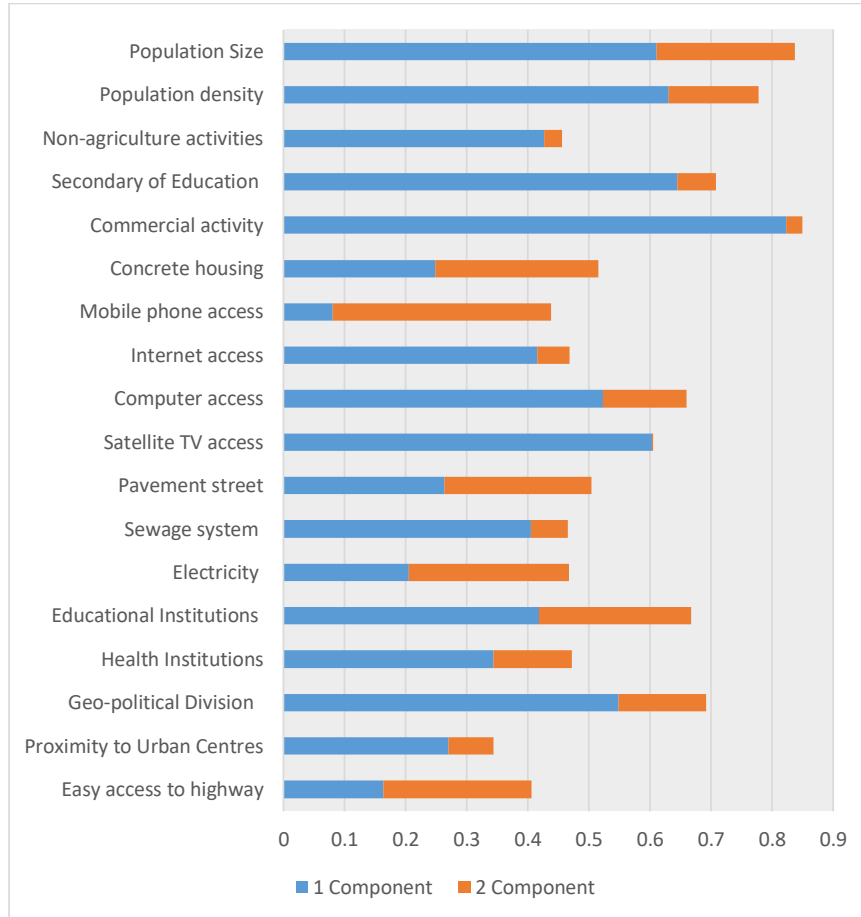

Supplementary Table 1. Categories and Quantifications derived from Categorical Principle Component Analysis.

| Population Size           |      |        | 4296.85                            | 1    | 3.114  | 78.95                            | 1    | 2.945  | 27.08 - 27.74              | 5    | 1.785  | 30.51 - 30.85         | 2    | 1.881  | 65.38                      | 1    | 1.097  |
|---------------------------|------|--------|------------------------------------|------|--------|----------------------------------|------|--------|----------------------------|------|--------|-----------------------|------|--------|----------------------------|------|--------|
| Category                  | Freq | Value  | 4583.00 - 4587.76                  | 2    | 3.114  | 82.28                            | 1    | 3.439  | 27.84 - 28.00              | 3    | 1.785  | 31.62                 | 1    | 1.881  | 66.67 - 66.94              | 3    | 1.097  |
| 36 - 226                  | 98   | -0.315 | 4864.89 - 4899.78                  | 2    | 9.148  | 85.07                            | 1    | 3.439  | 28.72 - 28.99              | 3    | 1.785  | 33.89                 | 1    | 3.44   | 68.83 - 69.81              | 3    | 1.097  |
| 227 - 461                 | 189  | -0.231 | <b>Non-agricultural activities</b> |      |        | 86.22 - 86.31                    | 2    | 5.432  | 30.29 - 30.58              | 2    | 1.785  | 34.58 - 34.68         | 2    | 3.44   | 72                         | 1    | 1.097  |
| 468 - 682                 | 25   | 0.688  | Category                           | Freq | Value  | 95.7                             | 1    | 5.432  | 31.03 - 31.33              | 2    | 1.785  | 37.86                 | 1    | 3.44   | 72.50 - 74.19              | 3    | 1.097  |
| 706 - 922                 | 7    | 1.288  | 0                                  | 1    | -0.953 | 98.15                            | 1    | 5.432  | 32.39                      | 1    | 1.83   | 38.24 - 38.90         | 3    | 3.44   | 76.67 - 77.30              | 2    | 1.097  |
| 1142                      | 1    | 1.367  | 3.85 - 4.76                        | 5    | -0.718 | <b>Adult secondary education</b> |      |        | 33.5                       | 1    | 2.315  | 39.09                 | 1    | 3.44   | <b>Mobile phone access</b> |      |        |
| 2597 - 2767               | 2    | 2.14   | 5.08 - 6.90                        | 15   | -0.718 | Category                         | Freq | Value  | 33.98                      | 1    | 5.315  | 44.22                 | 1    | 4.135  | Category                   | Freq | Value  |
| 3080 - 3186               | 2    | 2.971  | 6.94 - 8.55                        | 10   | -0.718 | 0                                | 1    | -1.197 | 38.39                      | 1    | 6.972  | 51.05                 | 1    | 5.274  | 18.97                      | 1    | -2.49  |
| 3306                      | 1    | 2.971  | 8.82 - 10.68                       | 18   | -0.718 | 0.81                             | 1    | -1.197 | 43.04                      | 1    | 6.972  | 51.71                 | 1    | 10.878 | 30.36                      | 1    | -2.49  |
| 3634                      | 1    | 4.297  | 10.74 - 12.62                      | 21   | -0.605 | 1.2                              | 1    | -1.197 | <b>Commercial activity</b> |      |        | <b>Cement housing</b> |      |        | 33.33                      | 2    | -2.49  |
| 4726                      | 1    | 4.942  | 12.63 - 14.49                      | 19   | -0.524 | 1.89 - 2.31                      | 7    | -1.197 | Category                   | Freq | Value  | Category              | Freq | Value  | 35.00 - 35.14              | 2    | -2.49  |
| 10169                     | 1    | 6.015  | 14.58 - 16.39                      | 19   | -0.469 | 2.73 - 3.23                      | 6    | -1.17  | 0                          | 23   | -0.449 | .00 - 1.08            | 24   | -2.052 | 37.18 - 37.86              | 4    | -2.226 |
| 29310 - 29356             | 2    | 9.225  | 16.51 - 18.33                      | 19   | -0.469 | 3.32 - 3.92                      | 7    | -0.991 | 53 - 93                    | 12   | -0.449 | 1.56 - 3.16           | 14   | -1.353 | 38.24                      | 1    | -1.971 |
| <b>Population density</b> |      |        | 18.75 - 20.18                      | 14   | -0.45  | 3.98 - 4.69                      | 15   | -0.899 | 1.10 - 1.87                | 25   | -0.449 | 3.39 - 5.17           | 6    | -1.199 | 39.76 - 40.00              | 3    | -1.971 |
| Category                  | Freq | Value  | 20.54 - 21.98                      | 12   | -0.45  | 4.76 - 5.44                      | 13   | -0.723 | 1.94 - 2.88                | 41   | -0.449 | 5.88 - 6.90           | 4    | -1.199 | 41.18                      | 1    | -1.971 |
| 1.49 - 9.02               | 36   | -0.288 | 22.22 - 23.76                      | 14   | -0.351 | 5.47 - 6.15                      | 17   | -0.723 | 2.90 - 3.75                | 26   | -0.429 | 7.41 - 9.09           | 13   | -1.01  | 42.35 - 42.86              | 3    | -1.971 |
| 9.09 - 98.97              | 248  | -0.288 | 24.36 - 25.68                      | 9    | -0.351 | 6.25 - 6.94                      | 18   | -0.669 | 4.00 - 4.76                | 21   | -0.429 | 9.33 - 10.94          | 6    | -1.01  | 44.23                      | 1    | -1.655 |
| 107.34 - 175.27           | 7    | 0.152  | 26.09 - 27.59                      | 9    | -0.156 | 7.02 - 7.62                      | 15   | -0.661 | 4.84 - 5.71                | 24   | -0.382 | 11.11 - 12.99         | 9    | -1.01  | 47.23 - 47.73              | 4    | -1.655 |
| 209.28 - 282.03           | 2    | 0.453  | 28.00 - 29.55                      | 14   | -0.156 | 7.73 - 8.40                      | 17   | -0.599 | 5.75 - 6.56                | 14   | -0.382 | 13.21 - 15.00         | 18   | -0.964 | 48.78                      | 1    | -1.655 |
| 474.79 - 558.14           | 2    | 0.453  | 30.00 - 31.51                      | 15   | -0.156 | 8.44 - 9.09                      | 16   | -0.593 | 6.73 - 7.58                | 12   | -0.382 | 15.22 - 16.67         | 12   | -0.41  | 50                         | 1    | -1.655 |
| 884.51                    | 1    | 0.475  | 32.14 - 33.62                      | 6    | -0.15  | 9.19 - 9.92                      | 16   | -0.261 | 7.69 - 8.54                | 9    | -0.252 | 17.24 - 18.82         | 9    | -0.41  | 51.58                      | 1    | -1.655 |
| 956.23                    | 1    | 0.475  | 34.01 - 35.36                      | 10   | 0.166  | 10.00 - 10.67                    | 8    | -0.261 | 8.65 - 9.46                | 9    | -0.252 | 19.61 - 20.75         | 9    | -0.312 | 52.07 - 53.33              | 6    | -1.655 |
| 1346.62 - 1384.59         | 2    | 0.672  | 35.59 - 37.44                      | 6    | 0.166  | 10.67 - 11.29                    | 14   | -0.261 | 9.52 - 10.40               | 14   | -0.015 | 21.05 - 22.77         | 12   | -0.312 | 53.62 - 54.24              | 4    | -1.655 |
| 1399.89                   | 1    | 0.672  | 38.16 - 39.31                      | 6    | 0.166  | 11.46 - 12.08                    | 7    | -0.261 | 10.57 - 11.36              | 9    | 0.104  | 23.44 - 24.64         | 7    | -0.018 | 55.93 - 56.72              | 5    | -0.703 |
| 1543.19                   | 1    | 0.672  | 39.39 - 41.24                      | 5    | 0.166  | 12.20 - 12.88                    | 14   | 0.173  | 11.59 - 12.06              | 3    | 0.104  | 25.00 - 26.83         | 14   | -0.018 | 57.45 - 57.89              | 6    | -0.703 |
| 1600.85                   | 1    | 0.672  | 41.28 - 42.86                      | 12   | 0.262  | 12.90 - 13.61                    | 16   | 0.173  | 12.50 - 12.88              | 9    | 0.104  | 27.06 - 28.85         | 6    | -0.018 | 58.70 - 59.78              | 7    | -0.703 |
| 1692.75                   | 1    | 0.672  | 43.33 - 45.05                      | 6    | 0.262  | 13.73 - 14.29                    | 9    | 0.173  | 13.33 - 13.91              | 8    | 0.104  | 28.89 - 30.77         | 10   | -0.018 | 60.22 - 60.53              | 6    | -0.689 |
| 1831.26                   | 1    | 0.672  | 45.28 - 46.81                      | 9    | 0.262  | 14.49 - 15.10                    | 12   | 0.173  | 14.34 - 14.96              | 5    | 0.104  | 30.95 - 32.56         | 13   | 0.2    | 61.18 - 62.07              | 7    | -0.536 |
| 1948.75 - 1984.76         | 2    | 1.304  | 47.68 - 48.59                      | 6    | 0.466  | 15.24 - 15.85                    | 7    | 0.173  | 15.29 - 16.09              | 4    | 0.27   | 32.91 - 34.67         | 9    | 0.734  | 62.77 - 63.64              | 11   | -0.536 |
| 2125.48                   | 1    | 1.304  | 49.04 - 50.79                      | 8    | 0.466  | 15.89 - 16.56                    | 11   | 0.194  | 16.18 - 17.07              | 7    | 0.442  | 34.78 - 36.36         | 12   | 0.734  | 64.00 - 64.94              | 11   | -0.536 |
| 2289.62                   | 1    | 1.304  | 52.48                              | 1    | 0.466  | 16.67 - 17.31                    | 9    | 0.297  | 17.14 - 17.88              | 7    | 0.496  | 37.04 - 38.46         | 12   | 0.734  | 64.95 - 66.20              | 9    | -0.536 |
| 2320.82 - 2325.26         | 2    | 1.304  | 52.83 - 54.55                      | 6    | 0.466  | 17.53 - 17.91                    | 6    | 0.537  | 18.06 - 18.78              | 4    | 0.496  | 39.53 - 40.54         | 5    | 0.734  | 66.28 - 67.44              | 11   | -0.536 |
| 2414.12 - 2465.53         | 4    | 2.275  | 54.90 - 56.52                      | 4    | 0.466  | 18.13 - 18.83                    | 7    | 0.537  | 19.15 - 19.87              | 4    | 0.496  | 41.03 - 42.55         | 8    | 0.895  | 68.00 - 68.75              | 10   | -0.536 |
| 2502.83                   | 1    | 2.547  | 56.94 - 58.33                      | 3    | 0.466  | 19.30 - 19.39                    | 3    | 0.537  | 20.75                      | 1    | 0.496  | 42.94 - 44.44         | 9    | 0.895  | 68.89 - 70.00              | 13   | -0.536 |
| 2696.57                   | 1    | 2.547  | 59.19 - 59.70                      | 2    | 1.396  | 19.59 - 20.26                    | 7    | 0.537  | 21.37 - 21.67              | 2    | 0.496  | 44.64 - 46.51         | 10   | 1.068  | 70.18 - 71.25              | 22   | -0.536 |
| 2923.71                   | 1    | 2.547  | 61.11 - 62.21                      | 3    | 1.396  | 20.55 - 20.72                    | 3    | 0.871  | 22.22 - 22.58              | 3    | 0.496  | 46.81 - 48.50         | 11   | 1.068  | 71.43 - 72.46              | 11   | 0.314  |
| 3053.99                   | 1    | 2.547  | 62.86 - 63.21                      | 4    | 1.396  | 21.13 - 21.58                    | 8    | 0.871  | 23.20 - 23.49              | 3    | 0.836  | 48.68 - 50.50         | 14   | 1.068  | 72.73 - 73.91              | 17   | 0.314  |
| 3196.02                   | 1    | 2.547  | 64.71                              | 1    | 1.396  | 21.96 - 22.50                    | 3    | 0.871  | 24.53 - 24.64              | 2    | 0.836  | 50.65 - 52.50         | 9    | 1.068  | 74.00 - 75.18              | 16   | 0.314  |
| 3260.98                   | 1    | 2.547  | 66.85 - 67.46                      | 2    | 2.945  | 22.65 - 22.96                    | 4    | 0.871  | 24.71 - 25.30              | 4    | 0.836  | 52.63 - 54.26         | 5    | 1.068  | 75.32 - 76.47              | 13   | 0.472  |
| 3357.47                   | 1    | 2.547  | 68.75 - 69.44                      | 4    | 2.945  | 23.49 - 23.59                    | 2    | 1.785  | 25.76                      | 1    | 0.836  | 54.72 - 56.45         | 8    | 1.068  | 76.54 - 77.78              | 19   | 0.646  |
| 3541.13                   | 1    | 2.547  | 71.82                              | 1    | 2.945  | 24.20 - 24.66                    | 4    | 1.785  | 26.81 - 27.14              | 4    | 0.836  | 56.79 - 57.14         | 3    | 1.097  | 78.02 - 79.09              | 15   | 0.646  |
| 3688.84                   | 1    | 2.547  | 73.13                              | 1    | 2.945  | 24.82 - 25.25                    | 3    | 1.785  | 27.54 - 28.30              | 2    | 0.836  | 59.09 - 60.27         | 5    | 1.097  | 79.25 - 80.36              | 15   | 0.646  |
| 3773.54                   | 1    | 2.547  | 74.6                               | 1    | 2.945  | 25.7                             | 1    | 1.785  | 28.57 - 28.87              | 3    | 0.836  | 60.53 - 62.35         | 7    | 1.097  | 80.41 - 81.61              | 16   | 0.874  |
| 4038.19                   | 1    | 3.114  | 75.66 - 76.44                      | 2    | 2.945  | 26.39 - 27.01                    | 2    | 1.785  | 29.46                      | 1    | 1.881  | 62.90 - 64.17         | 4    | 1.097  | 82.00 - 82.98              | 10   | 0.874  |

Continuation supplementary table 1

|                 |      |        |                 |      |        |                     |      |        |               |      |       |               |      |       |                            |      |        |
|-----------------|------|--------|-----------------|------|--------|---------------------|------|--------|---------------|------|-------|---------------|------|-------|----------------------------|------|--------|
| 83.15 - 84.21   | 6    | 0.874  | 9.52            | 1    | 2.933  | 21.62               | 1    | 2.804  | 11.76 - 12.06 | 3    | 1.168 | 9.09          | 1    | 1.264 | 77.27 - 79.25              | 9    | -0.324 |
| 84.38 - 85.53   | 6    | 1.18   | 10.28 - 10.34   | 2    | 2.933  | 23.08               | 1    | 2.804  | 12.50 - 13.79 | 5    | 1.168 | 9.38          | 1    | 1.264 | 79.59 - 81.63              | 8    | -0.324 |
| 85.71 - 86.84   | 8    | 1.18   | 10.69           | 1    | 4.077  | 24.84               | 1    | 5.014  | 14.00 - 14.81 | 3    | 1.168 | 12.5          | 1    | 1.264 | 81.82 - 83.72              | 13   | -0.208 |
| 87.18 - 87.50   | 6    | 1.18   | 11.76           | 1    | 4.077  | 27.94               | 1    | 5.483  | 15.56 - 16.82 | 4    | 1.168 | 15.49         | 1    | 1.264 | 84.04 - 85.98              | 24   | -0.208 |
| 88.24 - 89.19   | 6    | 1.286  | 12.9            | 1    | 4.077  | Satellite TV access |      |        | 17.59 - 18.06 | 3    | 1.168 | 22.8          | 1    | 5.878 | 86.25 - 88.28              | 34   | -0.171 |
| 89.58 - 90.70   | 3    | 1.286  | 13.04           | 1    | 4.077  | Category            | Freq | Value  | 19.98 - 20.00 | 3    | 1.876 | 25.99         | 1    | 5.878 | 88.52 - 90.70              | 33   | 0.631  |
| 90.91 - 91.67   | 3    | 1.286  | 13.33           | 1    | 4.077  | 0                   | 165  | -0.561 | 21.88 - 22.78 | 4    | 1.876 | 30.37         | 1    | 5.878 | 90.91 - 92.94              | 31   | 0.817  |
| 92.16 - 92.52   | 2    | 3.002  | Computer access |      |        | .83 - 1.37          | 31   | -0.263 | 23.81 - 24.14 | 2    | 1.876 | 35.17         | 1    | 5.878 | 93.12 - 95.12              | 32   | 0.817  |
| 93.33           | 1    | 3.002  | Category        | Freq | Value  | 1.45 - 2.13         | 27   | -0.263 | 25.00 - 25.71 | 3    | 1.876 | 41.68         | 1    | 5.878 | 95.29 - 97.06              | 27   | 1.149  |
| 95.74           | 1    | 3.002  | 0               | 101  | -0.887 | 2.15 - 2.86         | 14   | 0.373  | 27.42 - 27.63 | 2    | 1.876 | 51.33         | 1    | 5.878 | 97.67 - 99.01              | 12   | 1.398  |
| 96.97           | 1    | 3.002  | .70 - .87       | 2    | -0.663 | 3.03 - 3.61         | 18   | 0.373  | 28.17         | 1    | 1.876 | 61.17         | 1    | 5.878 | 100                        | 10   | 1.398  |
| 97.22           | 1    | 3.002  | .91 - 1.33      | 15   | -0.659 | 3.65 - 4.35         | 7    | 0.487  | 29.63 - 31.03 | 4    | 1.876 | 74.03         | 1    | 5.878 | Educational institutions   |      |        |
| Internet access |      |        | 1.37 - 1.79     | 17   | -0.457 | 4.38 - 5.08         | 12   | 0.487  | 31.43         | 1    | 1.876 | Electricity   |      |       | Category                   | Freq | Value  |
| Category        | Freq | Value  | 1.89 - 2.20     | 16   | -0.231 | 5.17 - 5.63         | 4    | 0.487  | 32.91 - 34.21 | 2    | 1.876 | Category      | Freq | Value | 0                          | 83   | -0.2   |
| 0               | 139  | -0.686 | 2.30 - 2.70     | 18   | -0.231 | 5.88 - 6.52         | 8    | 0.763  | 35.48         | 1    | 1.876 | 0             | 2    | -2.48 | 1                          | 145  | -0.2   |
| .66 - .73       | 3    | -0.686 | 2.82 - 3.13     | 17   | -0.231 | 6.82 - 7.14         | 3    | 0.763  | 36.00 - 37.31 | 2    | 1.876 | 1.35 - 2.22   | 3    | -2.48 | 2                          | 61   | -0.069 |
| .88 - 1.00      | 8    | -0.686 | 3.23 - 3.64     | 17   | -0.182 | 7.46 - 7.81         | 3    | 0.763  | 37.50 - 38.46 | 3    | 1.876 | 2.90 - 3.57   | 2    | -2.33 | 3                          | 22   | 0.037  |
| 1.03 - 1.26     | 24   | -0.273 | 3.65 - 4.00     | 11   | 0.091  | 8.41 - 8.77         | 4    | 0.763  | 39.53         | 1    | 1.899 | 6.67          | 1    | -2.33 | 4                          | 11   | 1.072  |
| 1.27 - 1.49     | 12   | -0.259 | 4.11 - 4.55     | 15   | 0.263  | 8.82 - 9.52         | 7    | 0.763  | 40.58         | 1    | 1.899 | 7.84 - 8.51   | 2    | -2.33 | 5                          | 3    | 1.072  |
| 1.52 - 1.75     | 20   | -0.092 | 4.60 - 4.92     | 5    | 0.263  | 9.68 - 10.14        | 5    | 1.679  | 42.06 - 43.33 | 5    | 1.899 | 15.05         | 1    | -2.33 | 7                          | 1    | 1.072  |
| 1.79 - 2.00     | 7    | -0.092 | 5.05 - 5.48     | 12   | 0.263  | 10.39 - 10.91       | 2    | 1.679  | 44.78         | 1    | 1.899 | 17.39 - 17.44 | 2    | -2.3  | 8                          | 1    | 5.607  |
| 2.04 - 2.17     | 8    | -0.092 | 5.62 - 5.83     | 5    | 0.263  | 12.00 - 12.43       | 4    | 1.679  | 45.61         | 1    | 1.899 | 22.22 - 22.89 | 3    | -2.3  | 9                          | 1    | 6.683  |
| 2.27 - 2.50     | 14   | -0.086 | 5.97 - 6.39     | 9    | 0.529  | 12.77               | 1    | 1.679  | 47.41 - 48.08 | 2    | 1.899 | 25            | 1    | -2.3  | 20                         | 1    | 7.697  |
| 2.53 - 2.74     | 10   | 0.208  | 6.45 - 6.82     | 8    | 0.529  | 16.68               | 1    | 1.705  | 48.65 - 48.98 | 3    | 1.899 | 25.33 - 27.50 | 2    | -2.3  | 21                         | 1    | 12.959 |
| 2.78 - 2.92     | 4    | 0.208  | 6.90 - 7.14     | 5    | 0.529  | 17.28               | 1    | 1.705  | 51.46 - 51.76 | 2    | 1.899 | 29.55         | 1    | -2.25 | Health institutions        |      |        |
| 3.03 - 3.23     | 13   | 0.6    | 7.44 - 7.66     | 4    | 0.89   | 18.42 - 18.82       | 2    | 1.705  | 56.53         | 1    | 1.899 | 32.81 - 34.15 | 2    | -2.25 | Category                   | Freq | Value  |
| 3.28 - 3.45     | 9    | 0.6    | 7.81 - 8.24     | 6    | 1.02   | 19.70 - 19.80       | 2    | 1.927  | 58.59         | 1    | 1.899 | 34.62 - 35.80 | 2    | -2.25 | None                       | 305  | -0.277 |
| 3.51 - 3.70     | 6    | 0.6    | 8.33 - 8.70     | 7    | 1.183  | 23.21               | 1    | 1.927  | 60            | 1    | 1.899 | 36.67 - 38.46 | 3    | -1.68 | Health centre              | 23   | 3.109  |
| 3.77 - 3.97     | 4    | 0.6    | 8.82 - 8.93     | 3    | 1.183  | 24.44               | 1    | 1.927  | 65.22         | 1    | 1.899 | 38.96 - 40.91 | 5    | -1.24 | Hospital                   | 2    | 6.494  |
| 4.00 - 4.05     | 3    | 0.6    | 9.24 - 9.52     | 5    | 1.183  | 29.6                | 1    | 1.927  | 66.67         | 1    | 1.899 | 42.06         | 1    | -1.24 | Close access to highway    |      |        |
| 4.29 - 4.48     | 7    | 0.6    | 9.68 - 10.02    | 4    | 1.183  | 32.18               | 1    | 1.927  | 71.11         | 1    | 1.899 | 44.12         | 1    | -1.24 | Category                   | Freq | Value  |
| 4.55            | 2    | 0.6    | 10.34 - 10.53   | 3    | 1.183  | 39.13               | 1    | 1.927  | 71.79         | 1    | 1.899 | 45.68 - 47.83 | 3    | -1.24 | No                         | 221  | -0.702 |
| 4.88 - 4.92     | 2    | 0.6    | 10.61 - 10.94   | 3    | 1.94   | 41.34               | 1    | 4.017  | 76.60 - 77.50 | 2    | 2.839 | 49.00 - 50.00 | 2    | -1.24 | Yes                        | 109  | 1.424  |
| 5.00 - 5.10     | 2    | 0.672  | 11.54 - 11.91   | 2    | 2.282  | 45.95               | 1    | 4.017  | Sewage system |      |       | 50.60 - 52.27 | 5    | -1.24 | Geo-political division     |      |        |
| 5.26 - 5.41     | 6    | 1.914  | 12.06           | 1    | 2.282  | 52.49               | 1    | 8.541  | Category      | Freq | Value | 53.03 - 53.33 | 4    | -1.14 | Category                   | Freq | Value  |
| 5.49 - 5.62     | 3    | 1.914  | 12.5            | 1    | 2.282  | 66.18               | 1    | 8.541  | .00 - .66     | 238  | -0.36 | 55.17 - 55.70 | 2    | -1.14 | Rural area                 | 292  | -0.324 |
| 5.77            | 1    | 1.914  | 12.91 - 13.16   | 2    | 2.305  | Paved streets       |      |        | .67 - 1.35    | 20   | 0.254 | 57.14 - 58.33 | 4    | -1.14 | Community                  | 30   | 1.877  |
| 6.00 - 6.19     | 4    | 2.138  | 13.54 - 13.64   | 2    | 2.305  | Category            | Freq | Value  | 1.41 - 2.08   | 22   | 0.366 | 59.38 - 60.53 | 2    | -0.83 | Town                       | 5    | 3.978  |
| 6.25 - 6.38     | 3    | 2.138  | 14.57           | 1    | 2.432  | .00 - 1.30          | 178  | -0.734 | 2.13 - 2.72   | 17   | 0.497 | 61.54 - 62.71 | 7    | -0.83 | City                       | 3    | 6.179  |
| 7.14 - 7.23     | 2    | 2.138  | 15.15           | 1    | 2.432  | 1.37 - 2.70         | 30   | -0.253 | 2.86 - 3.45   | 9    | 0.497 | 65.33         | 1    | -0.83 | Proximity to urban centres |      |        |
| 7.49 - 7.69     | 2    | 2.933  | 15.19 - 15.52   | 2    | 2.432  | 2.94 - 4.44         | 18   | 0.113  | 3.61 - 3.95   | 6    | 0.497 | 66.28 - 67.44 | 6    | -0.75 | Category                   | Freq | Value  |
| 8.11            | 1    | 2.933  | 16              | 1    | 2.432  | 4.49 - 6.00         | 15   | 0.113  | 4.65          | 1    | 0.497 | 68.42 - 70.11 | 7    | -0.32 | Far from the city          | 271  | -0.452 |
| 8.82            | 1    | 2.933  | 17.54 - 17.78   | 3    | 2.432  | 6.10 - 7.58         | 7    | 0.213  | 5.13 - 5.38   | 3    | 0.497 | 70.49 - 72.17 | 6    | -0.32 | Close to the city          | 55   | 1.914  |
| 9               | 1    | 2.933  | 18.79           | 1    | 2.804  | 7.81 - 8.89         | 3    | 0.918  | 5.98          | 1    | 1.264 | 73.44 - 74.51 | 4    | -0.32 | City                       | 4    | 4.279  |
| 9.3             | 1    | 2.933  | 19.57           | 1    | 2.804  | 9.32 - 10.71        | 8    | 0.918  | 7.67          | 1    | 1.264 | 75.00 - 77.01 | 10   | -0.32 |                            |      |        |

**Supplementary Table 2. Bivariate logistic regression between urbanicity score, urban variables and atopy**

| Indicators                              | SPT         |                    |                  |
|-----------------------------------------|-------------|--------------------|------------------|
|                                         | OR          | 95% CI             | p                |
| Urbanicity Score <sup>A</sup>           | <b>0.94</b> | <b>(0.90-0.99)</b> | <b>0.014</b>     |
| Population Size <sup>B</sup>            | <b>0.80</b> | <b>(0.68-0.92)</b> | <b>0.002</b>     |
| Population density <sup>C</sup>         | <b>0.91</b> | <b>(0.84-0.98)</b> | <b>0.018</b>     |
| Non-Agriculture activities <sup>D</sup> | 0.94        | (0.87-1.003)       | 0.064            |
| Secondary Education <sup>D</sup>        | 0.93        | (0.74-1.12)        | 0.479            |
| Commercial activities <sup>D</sup>      | <b>0.91</b> | <b>(0.82-0.99)</b> | <b>0.046</b>     |
| Concrete housing <sup>D</sup>           | 0.96        | (0.86-1.07)        | 0.464            |
| Mobile phone access <sup>D</sup>        | 0.99        | (0.79-1.21)        | 0.995            |
| Internet access <sup>D</sup>            | <b>0.94</b> | <b>(0.90-0.98)</b> | <b>0.015</b>     |
| Computer access <sup>D</sup>            | 0.97        | (0.68-1.26)        | 0.830            |
| Satellite TV access <sup>D</sup>        | 0.94        | (0.84-1.05)        | 0.292            |
| Pavement street <sup>D</sup>            | 1.04        | (0.96-1.13)        | 0.325            |
| Sewage system <sup>D</sup>              | 0.89        | (0.76-1.02)        | 0.109            |
| Electricity <sup>D</sup>                | <b>1.15</b> | <b>(1.0-1.31)</b>  | <b>0.046</b>     |
| Educational Institutions                | <b>0.97</b> | <b>(0.95-0.99)</b> | <b>0.002</b>     |
| <b>Health facilities</b>                |             |                    |                  |
| Health centre vs None                   | 0.82        | (0.51-1.34)        | 0.437            |
| Hospital vs None                        | <b>0.60</b> | <b>(0.16-0.25)</b> | <b>0.001</b>     |
| <b>Road connectivity</b>                |             |                    |                  |
| Yes vs No                               | 0.88        | (0.61-1.26)        | 0.478            |
| <b>Geographical division</b>            |             |                    |                  |
| Community vs Countryside                | 0.88        | (0.53-1.48)        | 0.652            |
| Town vs Countryside                     | <b>0.59</b> | <b>(0.36-0.98)</b> | <b>0.042</b>     |
| City vs Countryside                     | <b>0.58</b> | <b>(0.43-0.78)</b> | <b>&lt;0.001</b> |
| <b>Urban closeness</b>                  |             |                    |                  |
| Distant vs Urban                        | <b>0.66</b> | <b>(0.45-0.96)</b> | <b>0.030</b>     |
| Periphery vs Urban                      | <b>0.51</b> | <b>(0.38-0.69)</b> | <b>&lt;0.001</b> |

A= increase by point (Range 0-10); B= increase by 10,000 population;  
C= increase by 1000 population /km<sup>2</sup>; D= increase by 10 percentual points.  
SPT= skin prick test
